# Supplementary material for: Organocatalytic stereoselective approach to the total synthesis of (−)-halosaline
Source: Royal Society of Chemistry journal article supplement (doi:10.1039/c3ra44700f), 2013-11-22

## Supporting Information

# Organocatalytic stereoselective approach to the total synthesis of (-)-halosaline

Vishwajeet Jha<sup>a</sup> and Pradeep Kumar\*<sup>a</sup>

*<sup>a</sup>Division of Organic Chemistry, CSIR-NCL (National Chemical Laboratory), Pune 411008, India*

\*Corresponding Author: Telephone number: +91-20-25902050, Fax number: +91-20-25893614;

e-mail address: [pk.tripathi@ncl.res.in](mailto:pk.tripathi@ncl.res.in)

## Table of contents

|                                                                     |                    |
|---------------------------------------------------------------------|--------------------|
| <b>General Experimental</b>                                         | <b>S3</b>          |
| 1. $^1\text{H}$ and $^{13}\text{C}$ spectra for compound <b>9</b>   | <b>S4</b>          |
| 2. Chiral GC for compound <b>9</b>                                  | <b>S5 &amp; S6</b> |
| 3. $^1\text{H}$ and $^{13}\text{C}$ spectra for compound <b>11</b>  | <b>S7</b>          |
| 4. $^1\text{H}$ and $^{13}\text{C}$ spectra for compound <b>8</b>   | <b>S8</b>          |
| 5. HPLC of compound <b>8</b>                                        | <b>S9</b>          |
| 6. $^1\text{H}$ and $^{13}\text{C}$ spectra for compound <b>12</b>  | <b>S10</b>         |
| 7. $^1\text{H}$ and $^{13}\text{C}$ spectra for compound <b>13</b>  | <b>S11</b>         |
| 8. $^1\text{H}$ and $^{13}\text{C}$ spectra for compound <b>18</b>  | <b>S12</b>         |
| 9. $^1\text{H}$ and $^{13}\text{C}$ spectra for compound <b>19</b>  | <b>S13</b>         |
| 10. $^1\text{H}$ and $^{13}\text{C}$ spectra for compound <b>20</b> | <b>S14</b>         |
| 11. $^1\text{H}$ and $^{13}\text{C}$ spectra for compound <b>21</b> | <b>S15</b>         |
| 12. $^1\text{H}$ and $^{13}\text{C}$ spectra for compound <b>1</b>  | <b>S16</b>         |
| 13. $^1\text{H}$ and $^{13}\text{C}$ spectra for compound <b>17</b> | <b>S17</b>         |
| 14. $^1\text{H}$ and $^{13}\text{C}$ spectra for compound <b>15</b> | <b>S18</b>         |

### General Methods :

All reactions requiring anhydrous conditions were performed under a positive pressure of argon using oven-dried glassware (110 °C), which was cooled under argon. Solvents used for chromatography were distilled at respective boiling points using known procedures.

All commercial reagents were obtained from Sigma-Aldrich Chemical Co. and Alfa Aesar. Progress of the reactions was monitored by TLC using precoated aluminium plates (Merck kieselgel 60 F<sub>254</sub>). Column chromatographies were performed on silica gel 60-120/ 100-200/ 230-400 mesh obtained from S. D. Fine Chemical Co. India or Spectrochem India. Typical syringe and cannula techniques were used to transfer air- and moisture-sensitive reagents.

IR spectra were recorded on a Perkin–Elmer infrared spectrometer model 599-B and model 1620 FT-IR. <sup>1</sup>H NMR spectra were recorded on Bruker AC-200, Bruker AV-400, Jeol-400 and Bruker DRX – 500 instruments using deuterated solvent. Chemical shifts are reported in ppm. Proton coupling constants (*J*) are reported as absolute values in Hz and multiplicity (br, broadened; s, singlet; d, doublet; t, triplet; m, multiplet). <sup>13</sup>C NMR spectra were recorded on Bruker AC-200, Bruker AV- 400, Jeol-400 and Bruker DRX-500 instruments operating at 50 MHz, 100 MHz, and 125 MHz, respectively. <sup>13</sup>C NMR chemical shifts are reported in ppm relative to the central line of CDCl<sub>3</sub> (δ 77.0). Elemental analyses were determined at Central Elemental Analysis Facility division at National Chemical Laboratory. All HPLC analyses used to determine enantiomeric purity were calibrated with sample of the racemate.

### Ethyl (*R*)-4-hydroxyheptanoate (9):

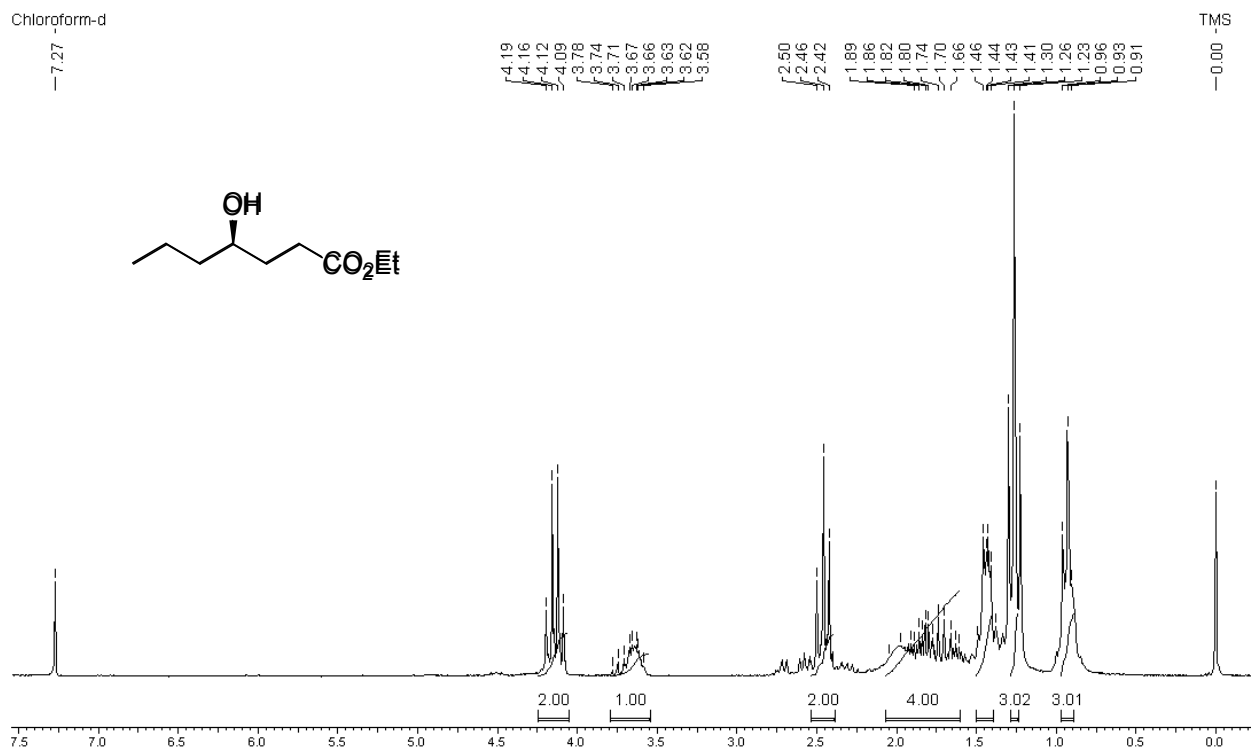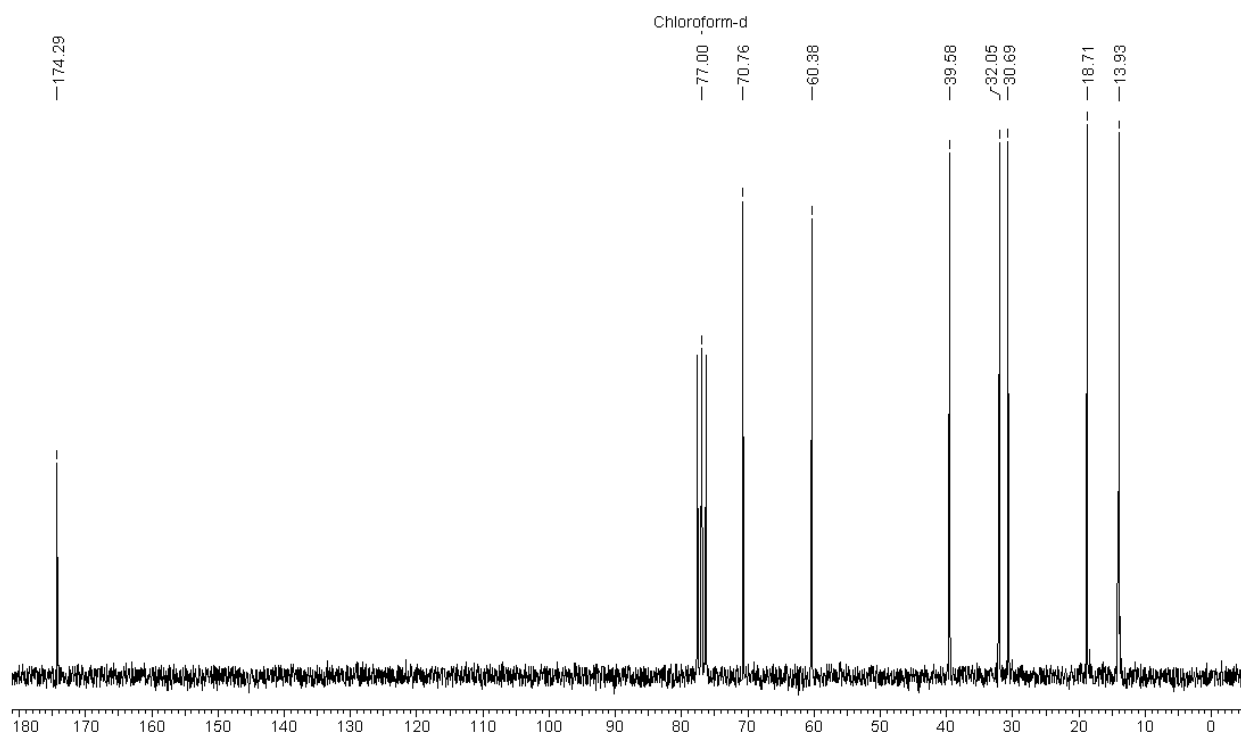

### Enantiomeric excess:

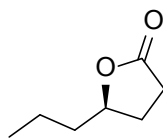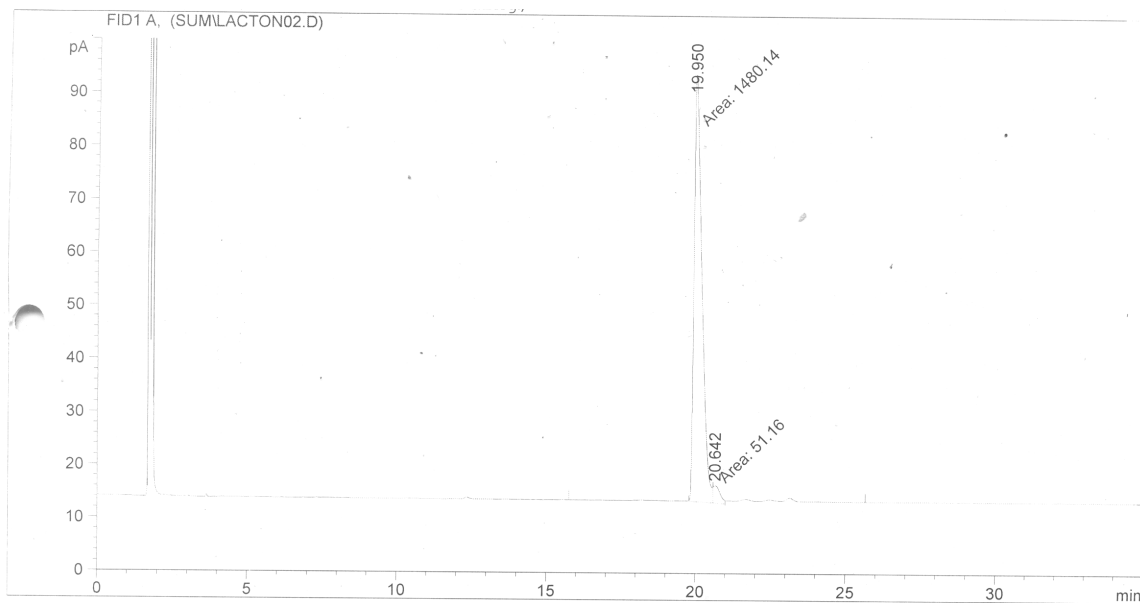

=====  
Area Percent Report  
=====

Sorted By : Signal  
Multiplier : 1.0000  
Concentration : 1.0000  
Sample Amount : 2.00000 [ng/ul] (not used in calc.)

Signal 1: FID1 A,

| Peak # | RetTime [min] | Type | Width [min] | Area [pA*s] | Height [pA] | Area %   |
|--------|---------------|------|-------------|-------------|-------------|----------|
| 1      | 19.950        | MF   | 0.3058      | 1480.13977  | 80.67734    | 96.65905 |
| 2      | 20.642        | FM   | 0.2582      | 51.16001    | 3.30218     | 3.34095  |

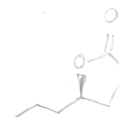

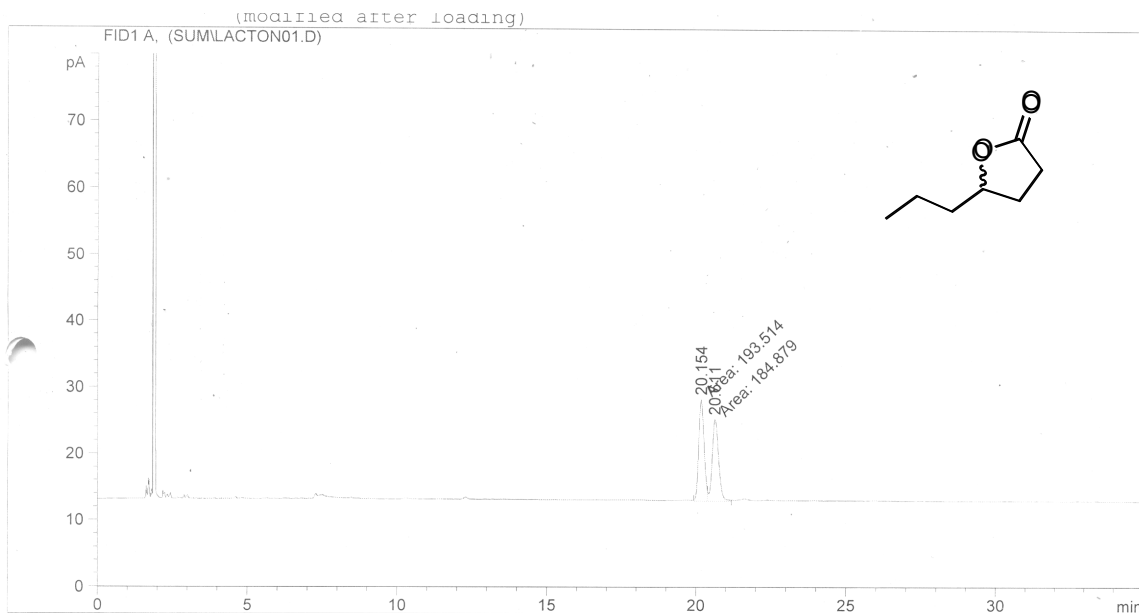

=====  
Area Percent Report  
=====

Sorted By : Signal  
Multiplier : 1.0000  
Dilution : 1.0000  
Sample Amount : 2.00000 [ng/ul] (not used in calc.)

Signal 1: FID1 A,

| Peak # | RetTime [min] | Type | Width [min] | Area [pA*s] | Height [pA] | Area %   |
|--------|---------------|------|-------------|-------------|-------------|----------|
| 1      | 20.154        | MF   | 0.2097      | 193.51364   | 15.37672    | 51.14102 |
| 2      | 20.611        | FM   | 0.2495      | 184.87860   | 12.35137    | 48.85898 |

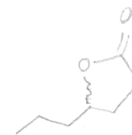

### Ethyl (*R*)-4-((*tert*-butyldimethylsilyloxy)heptanoate (11):

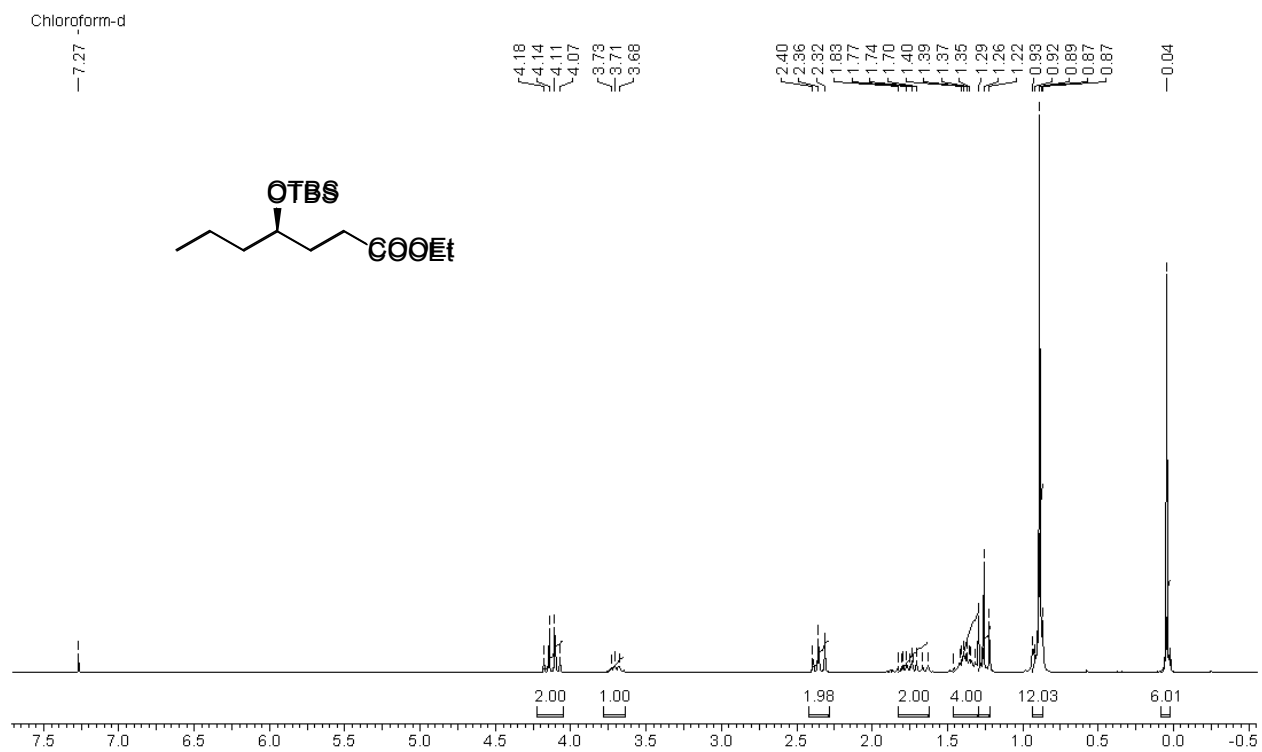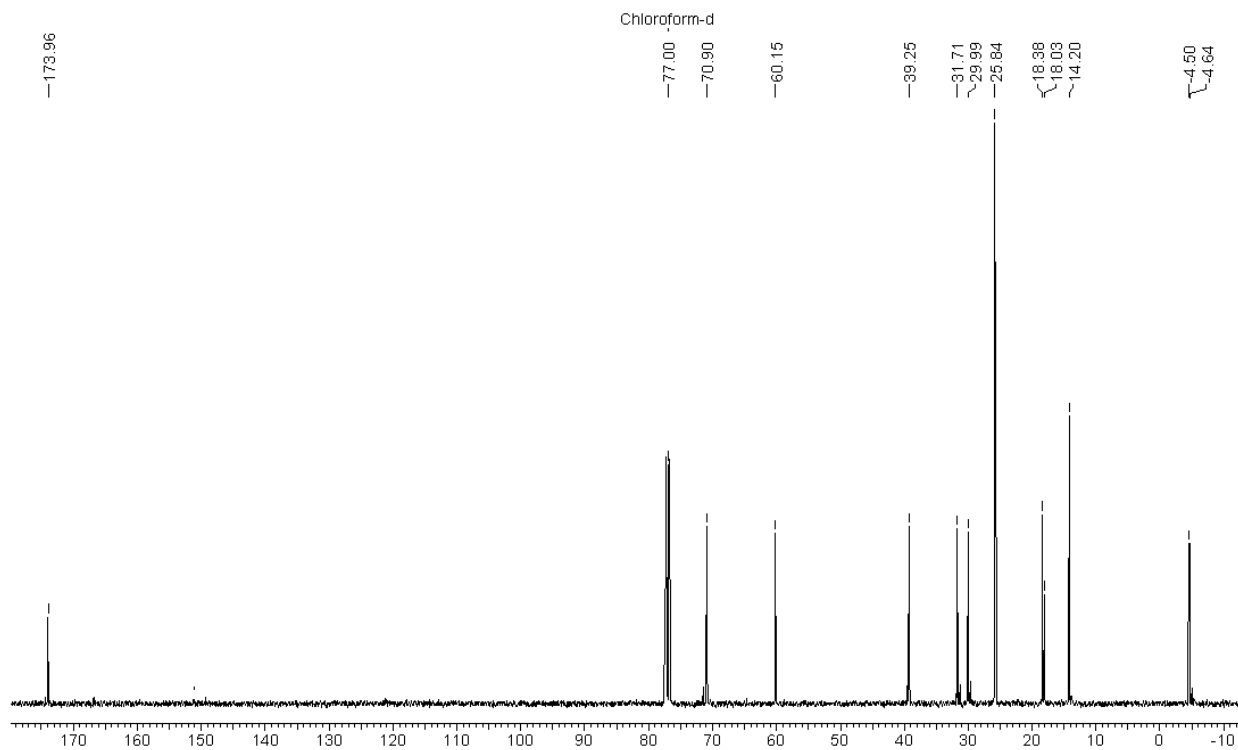

**Dibenzyl 1-((4S,6R,E)-6-((*tert*-butyldimethylsilyl)oxy)-1-ethoxy-1-oxonon-2-en-4-yl)hydrazine-1,2-dicarboxylate (8):**

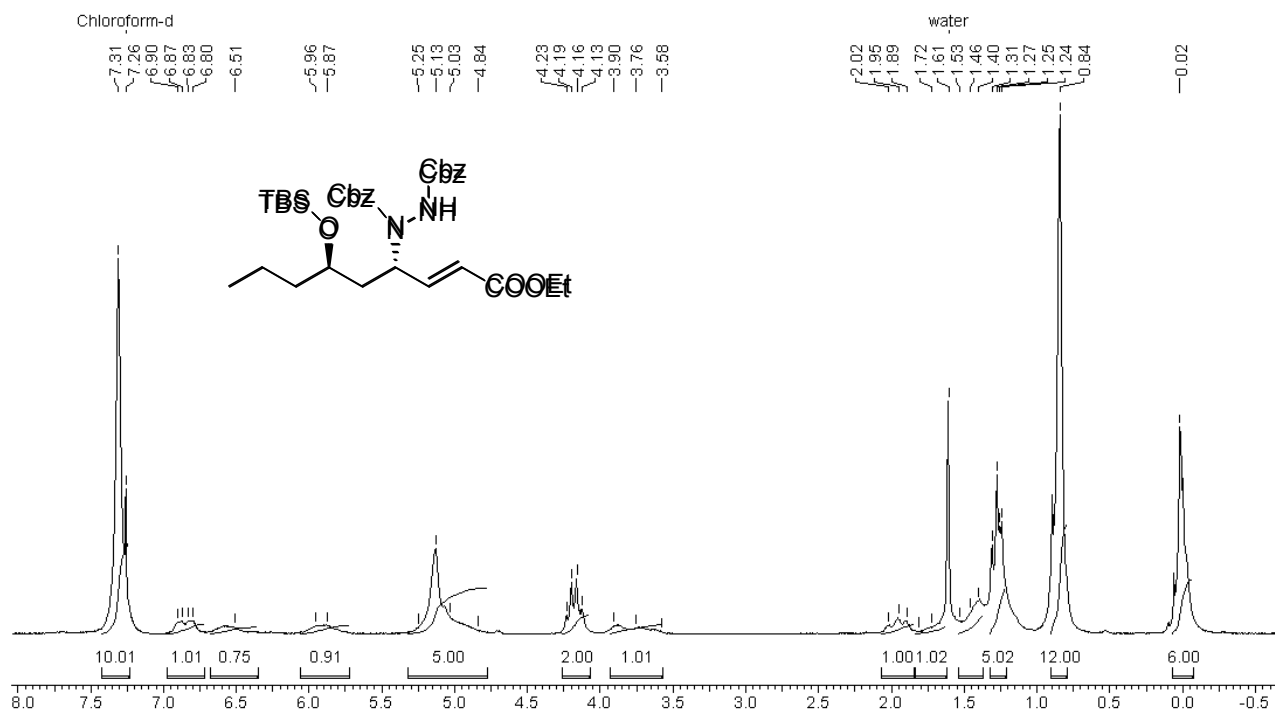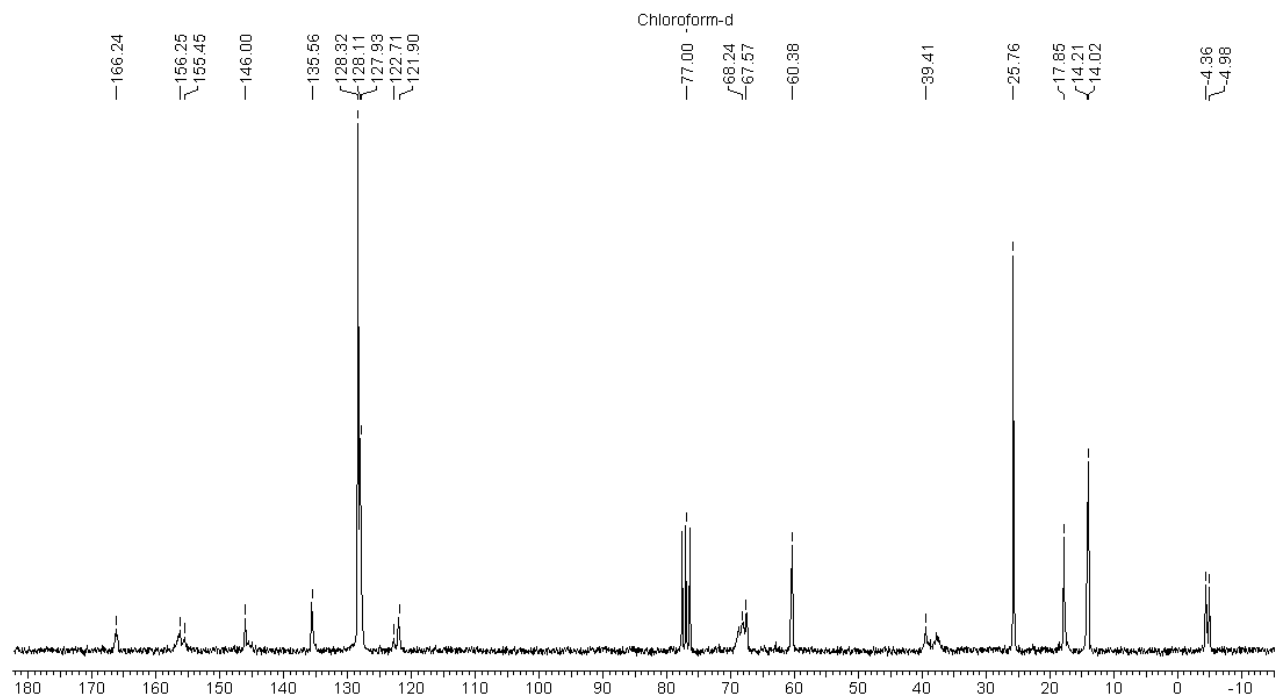



Volume: 10.0 ul

Chrom Type: HPLC Channel : 1

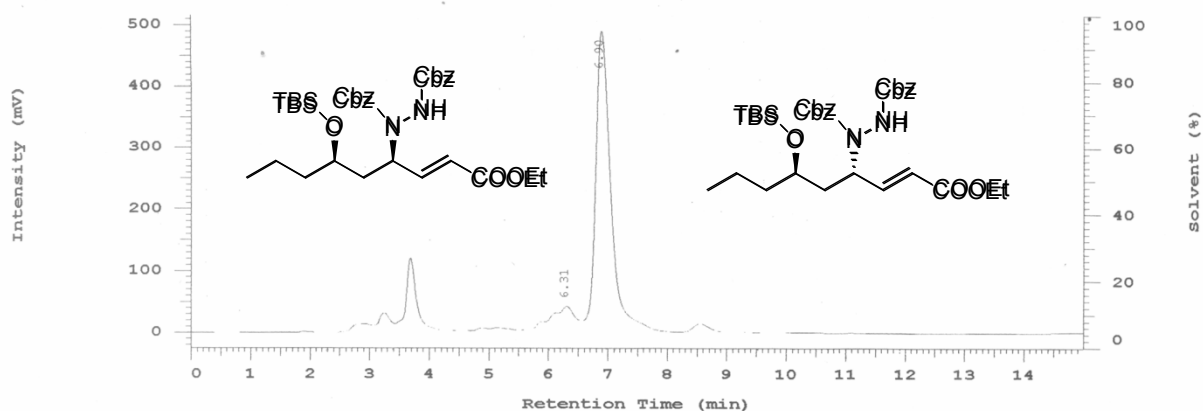

Peak Quantitation: AREA

Calculation Method: AREA%

| No. | RT   | Height | Area    | Area %  |
|-----|------|--------|---------|---------|
| 1   | 6.31 | 15473  | 153762  | 1.940   |
| 2   | 6.90 | 474211 | 7773316 | 98.060  |
|     |      | 489684 | 7927078 | 100.000 |

**Ethyl (4*R*,6*R*)-4-((*tert*-butoxycarbonyl)amino)-6-((*tert*-butyldimethylsilyl)oxy)nonanoate (12):**

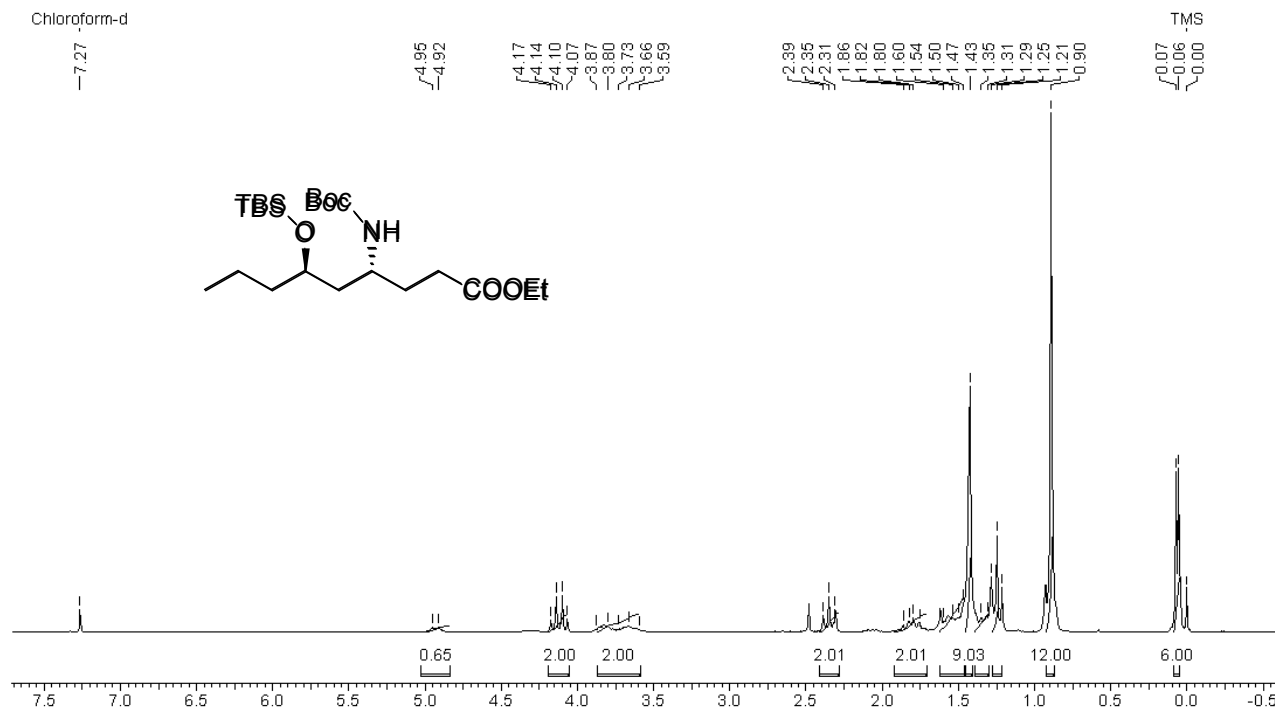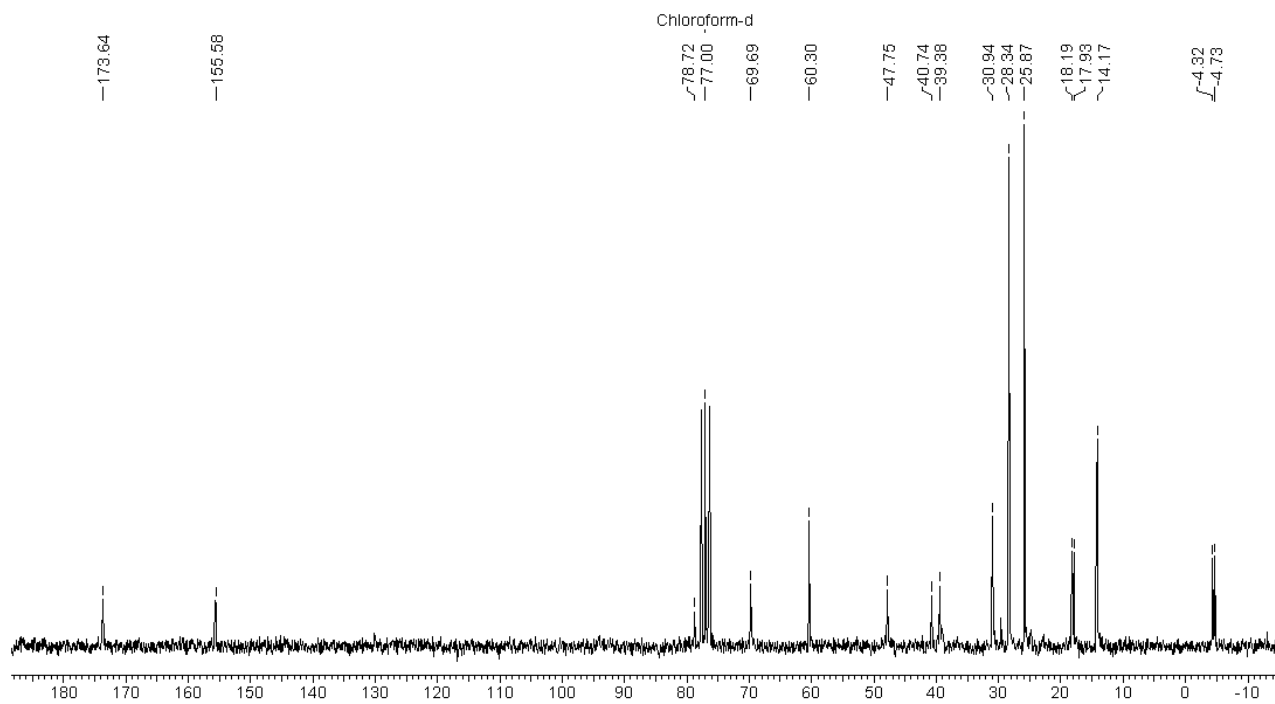

***tert*-Butyl ((4*R*,6*R*)-6-((*tert*-butyldimethylsilyl)oxy)-1-hydroxynonan-4-yl)carbamate (13):**

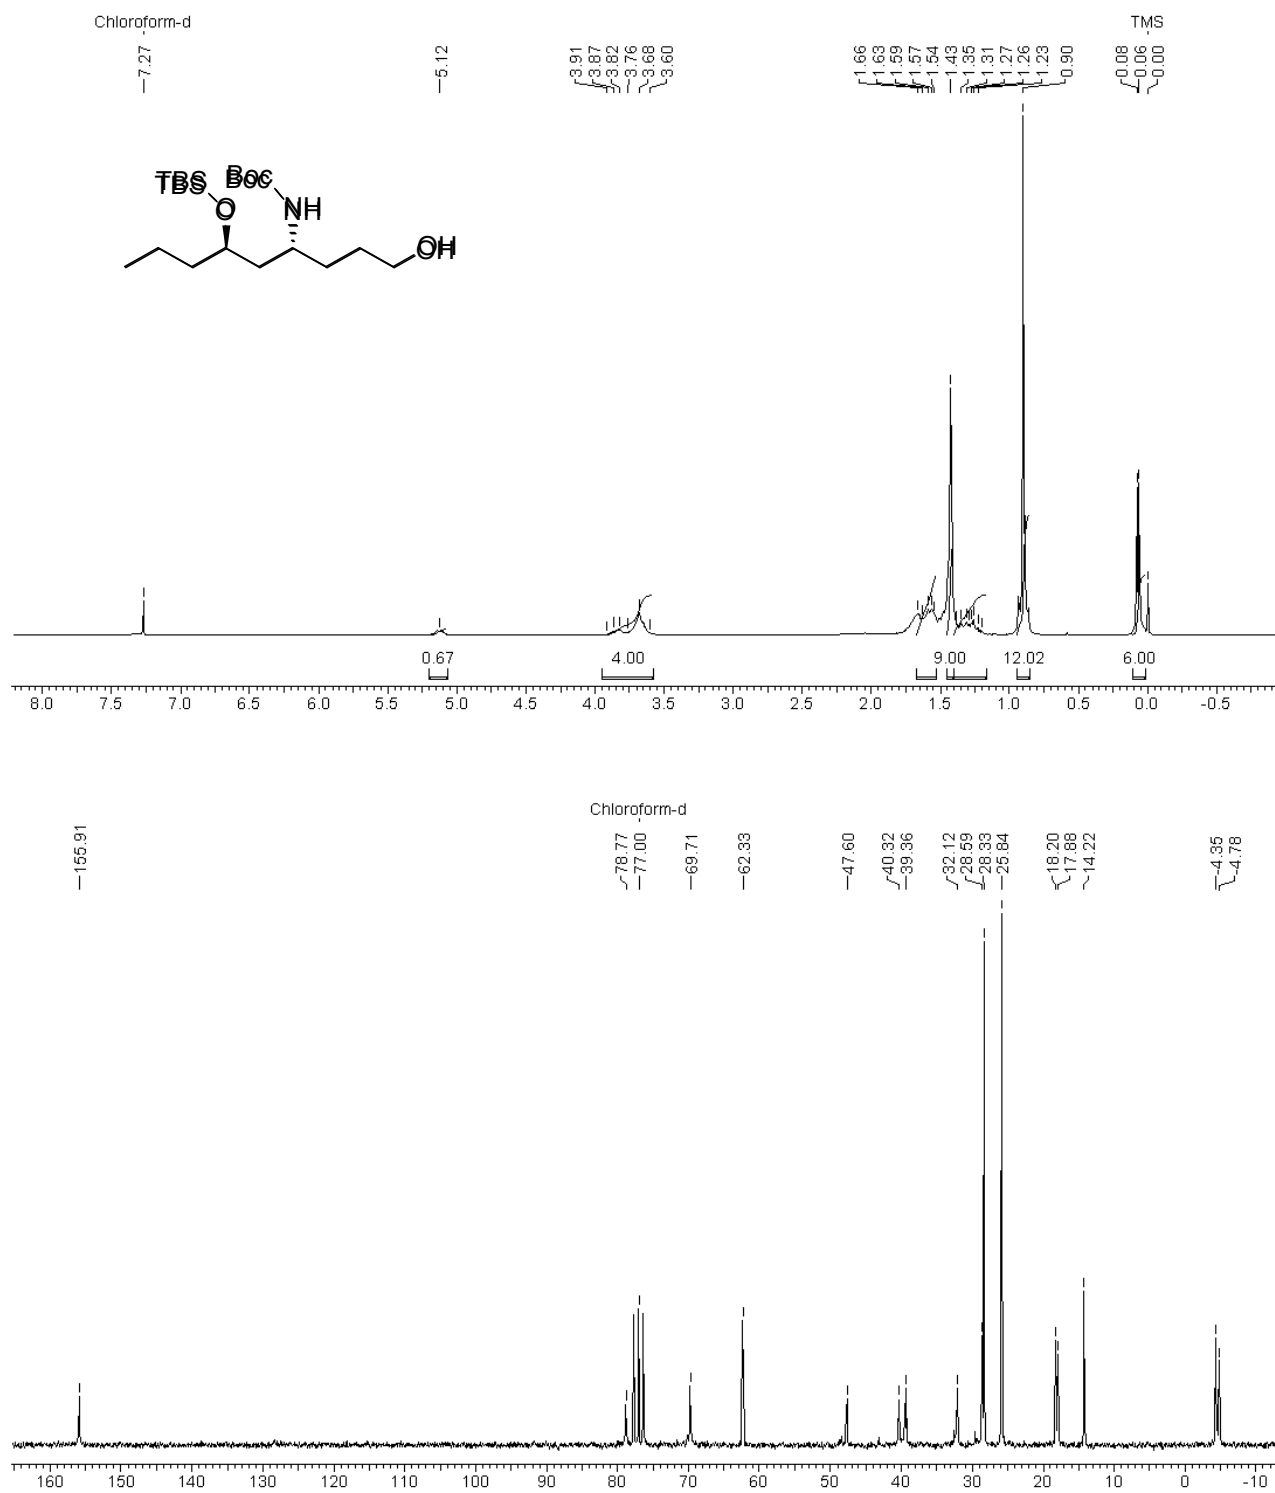

***tert*-Butyl ((4*R*,6*R*)-6-((*tert*-butyldimethylsilyl)oxy)-1-cyanononan-4-yl)carbamate (18):**

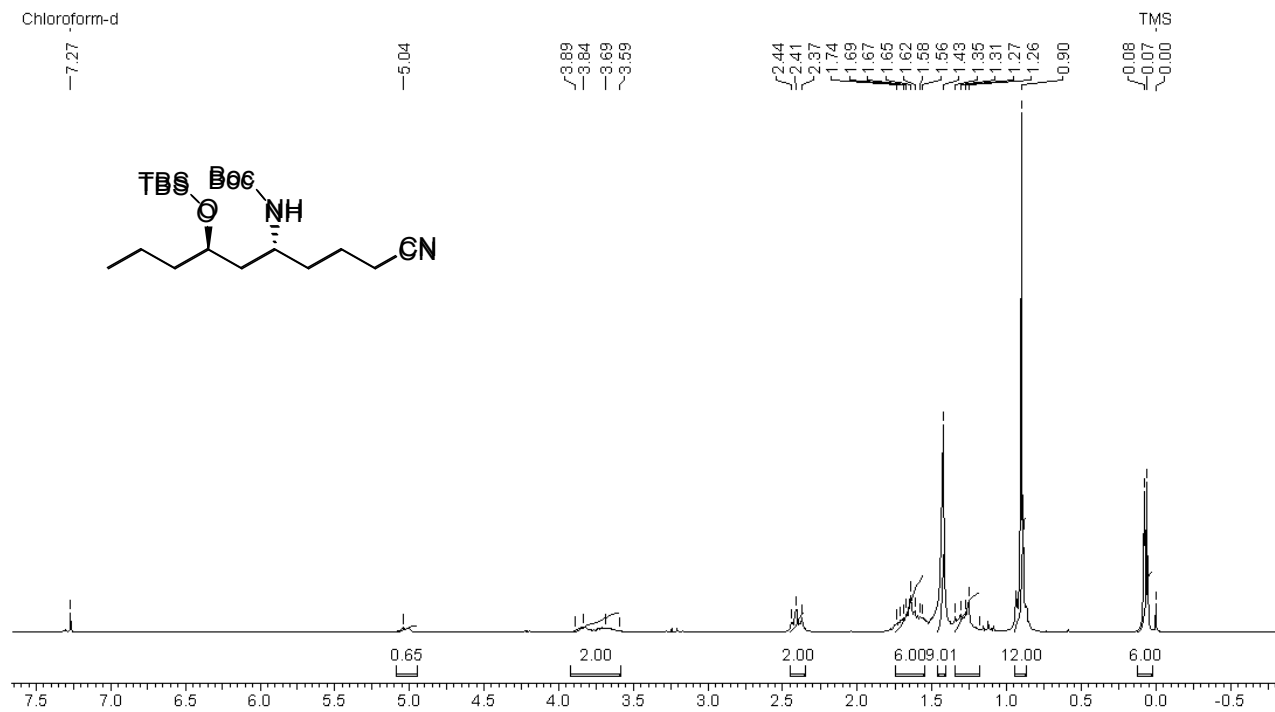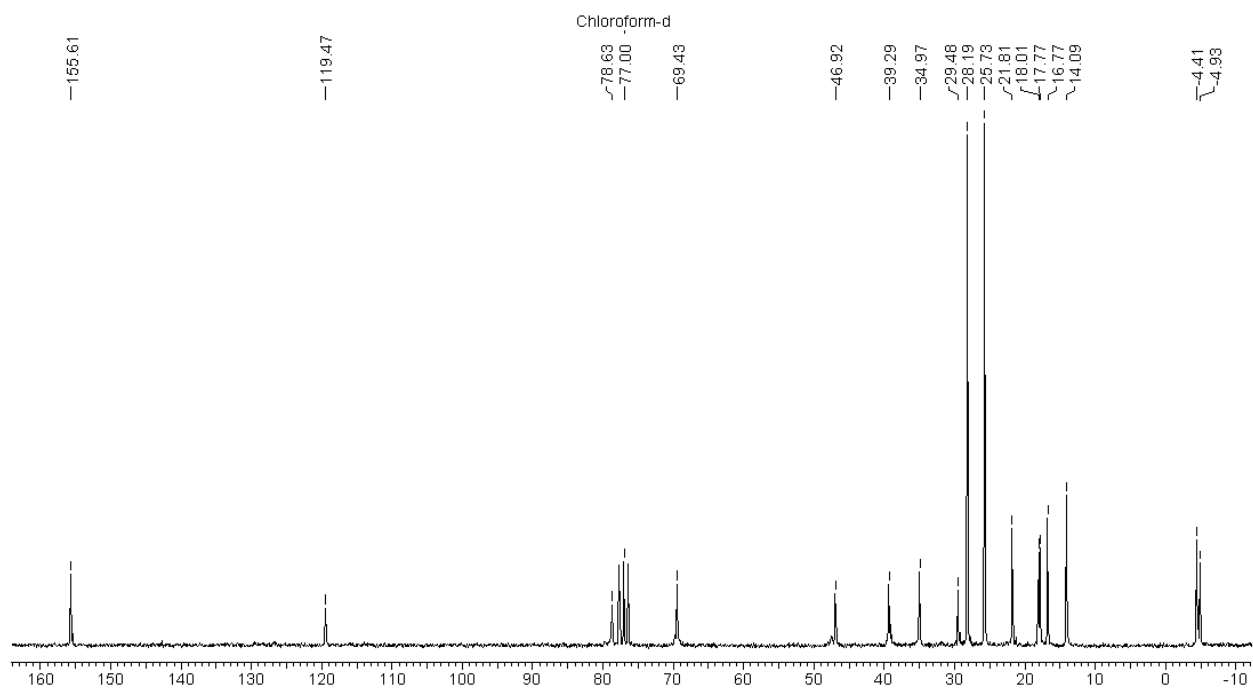

***tert*-Butyl (R)-2-((R)-2-((*tert*-butyldimethylsilyloxy)pentyl)-3,4-dihydropyridine-1(2H)-carboxylate (19):**

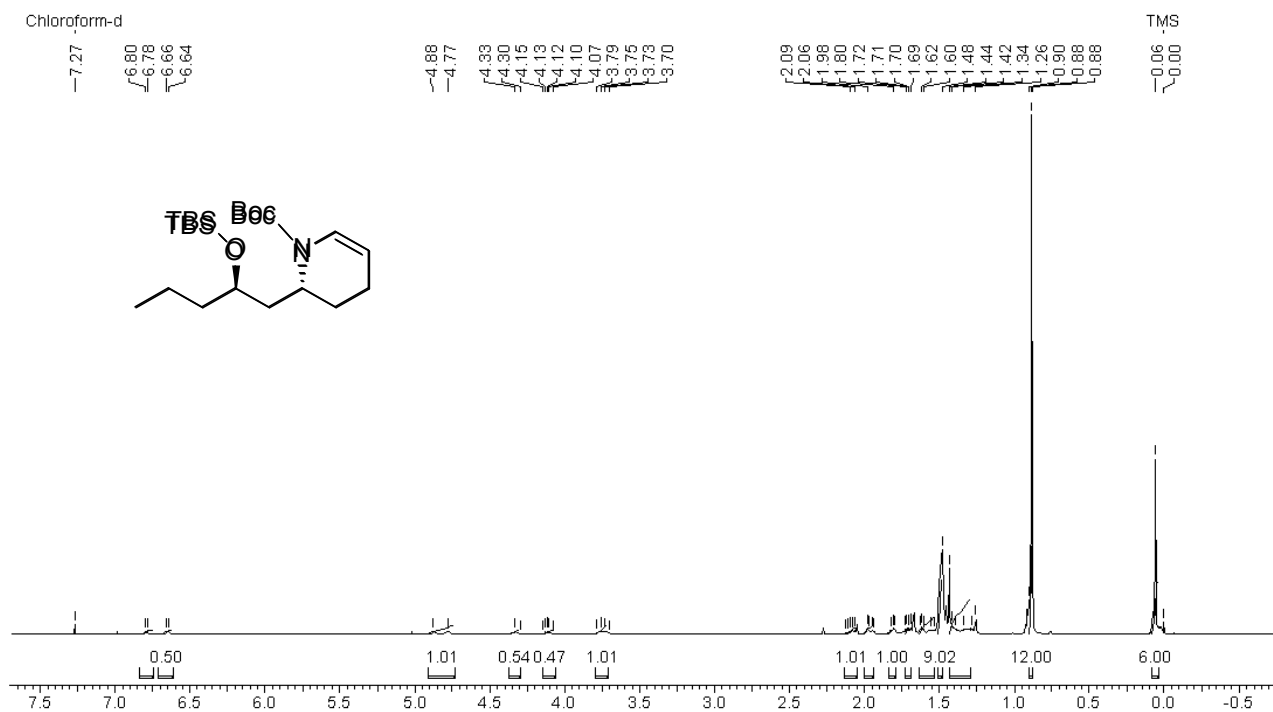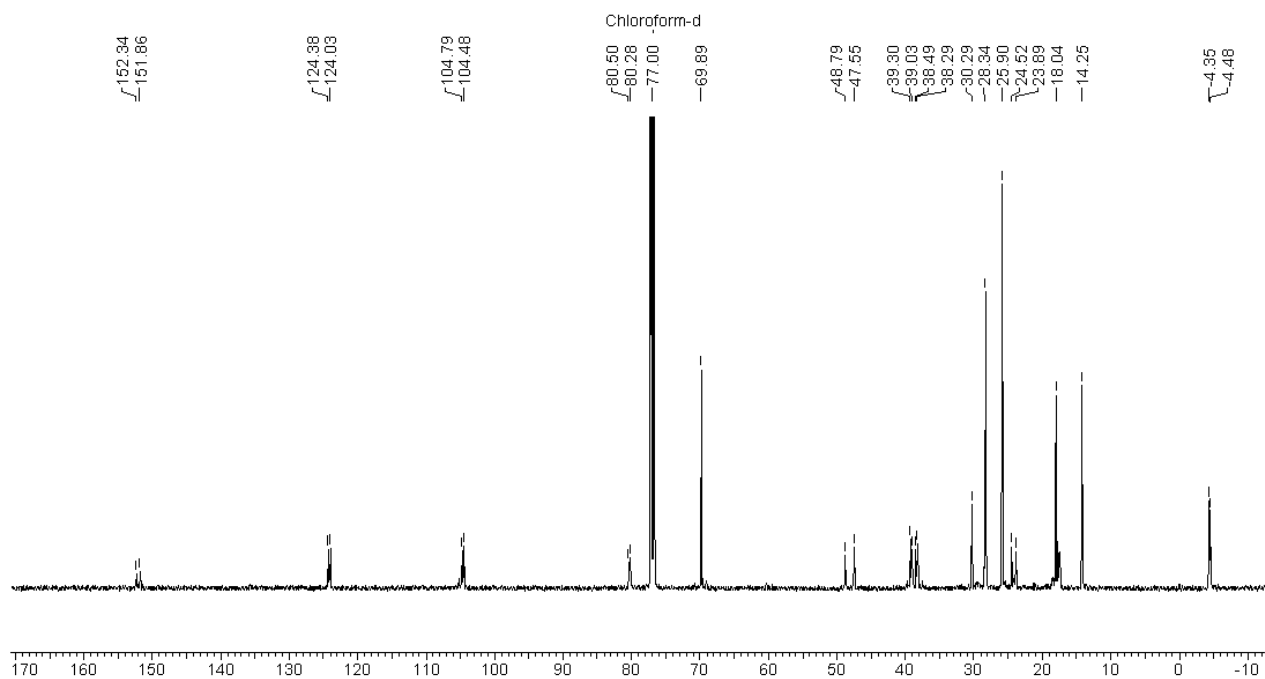

***tert*-Butyl ((5*R*,7*R*)-7-((*tert*-butyldimethylsilyl)oxy)-1-hydroxydecan-5-yl)carbamate (20):**

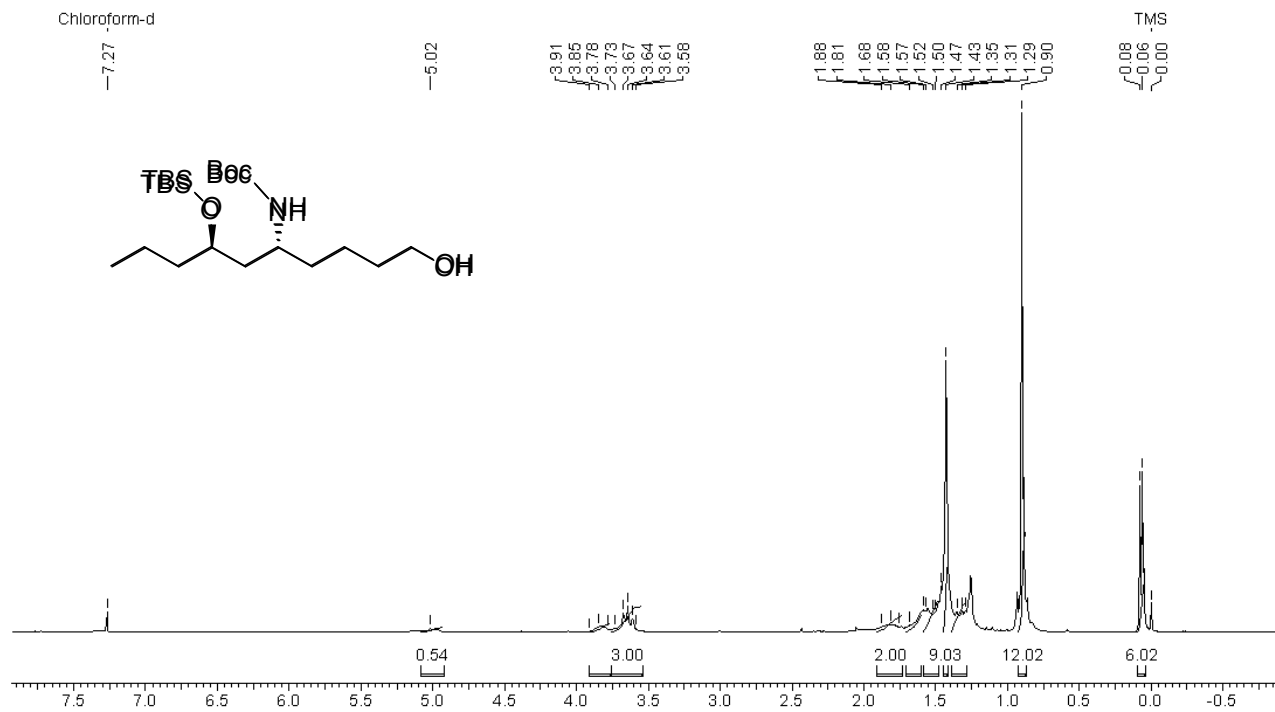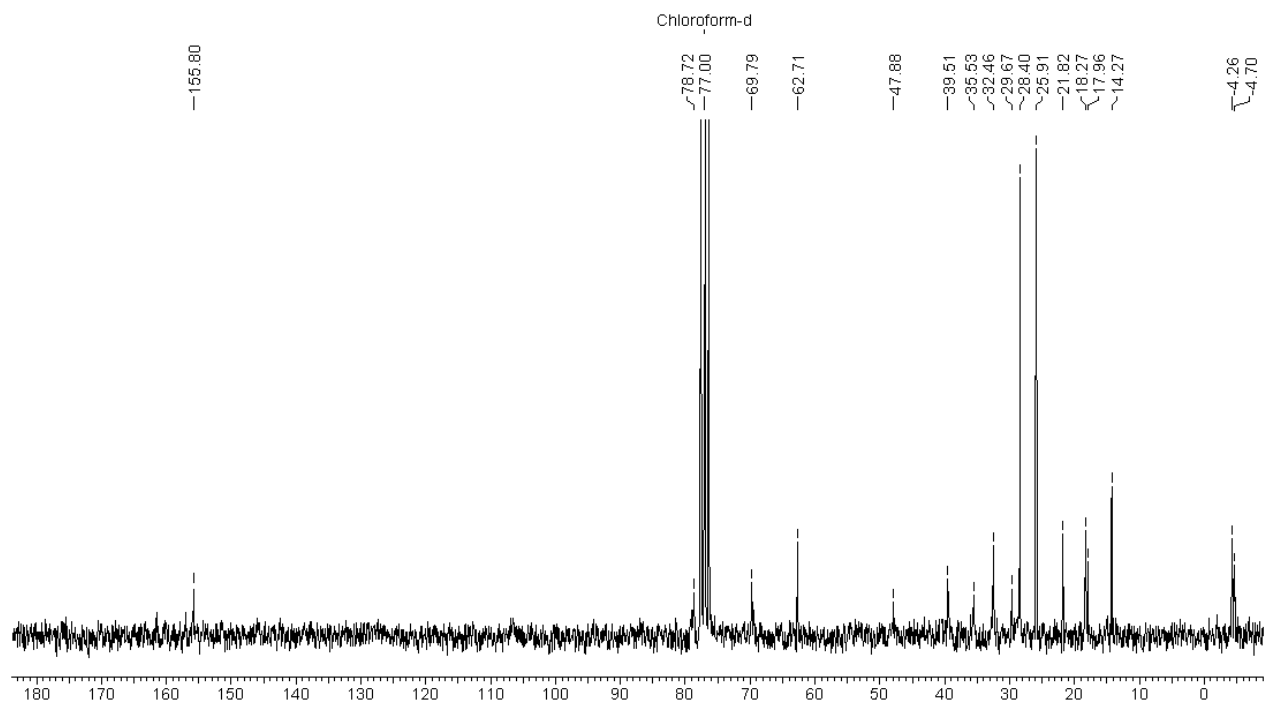

***tert*-Butyl (*R*)-2-((*R*)-2-((*tert*-butyldimethylsilyloxy)pentyl)piperidine-1-carboxylate (21):**

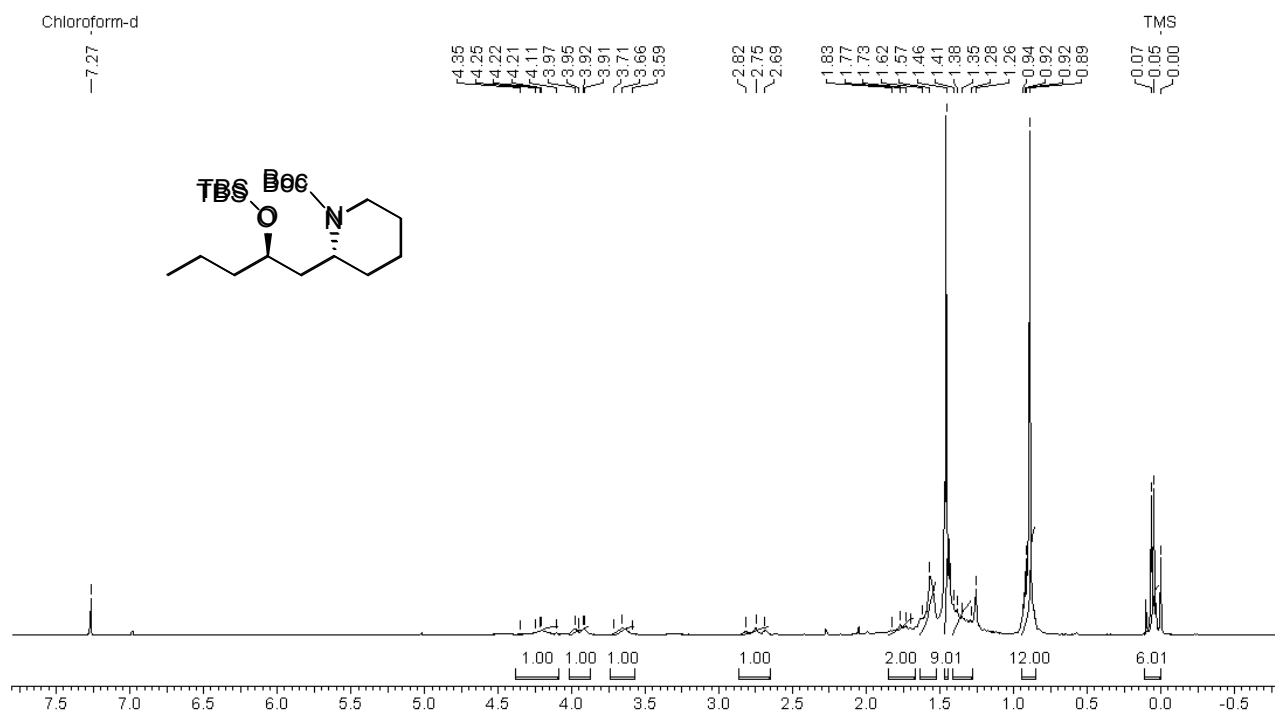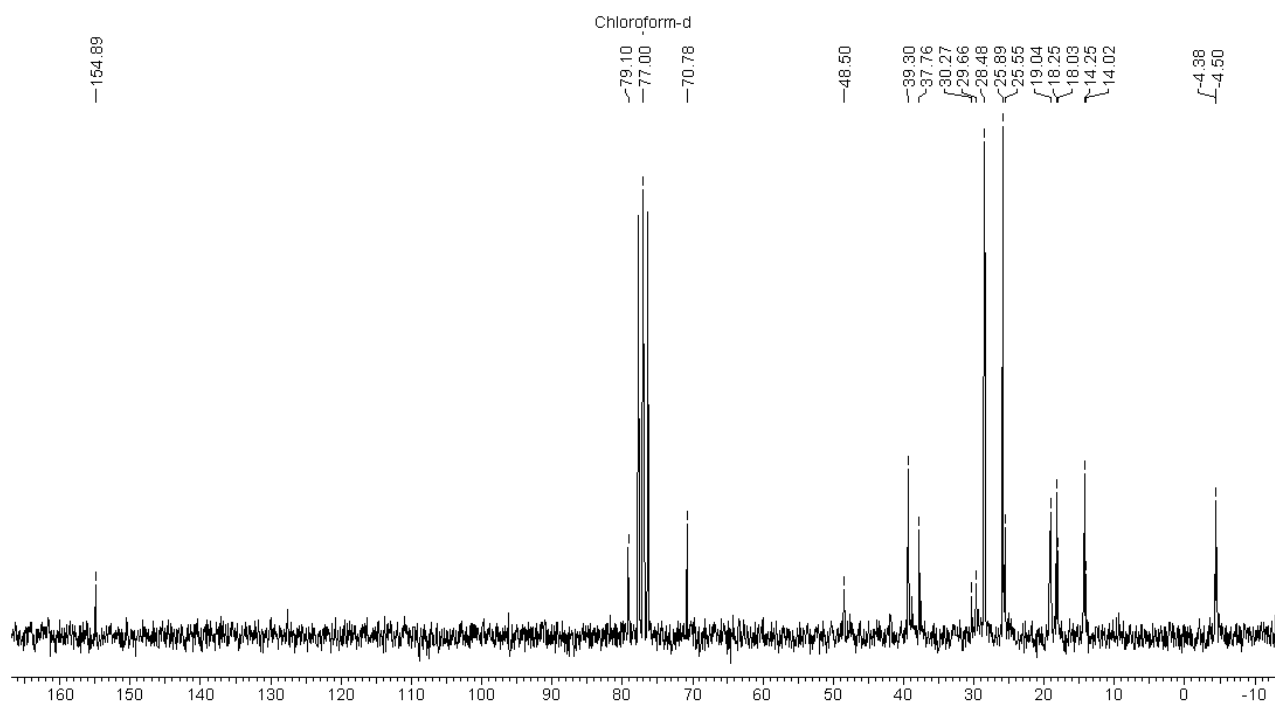

**(-)-Halosaline (1):**

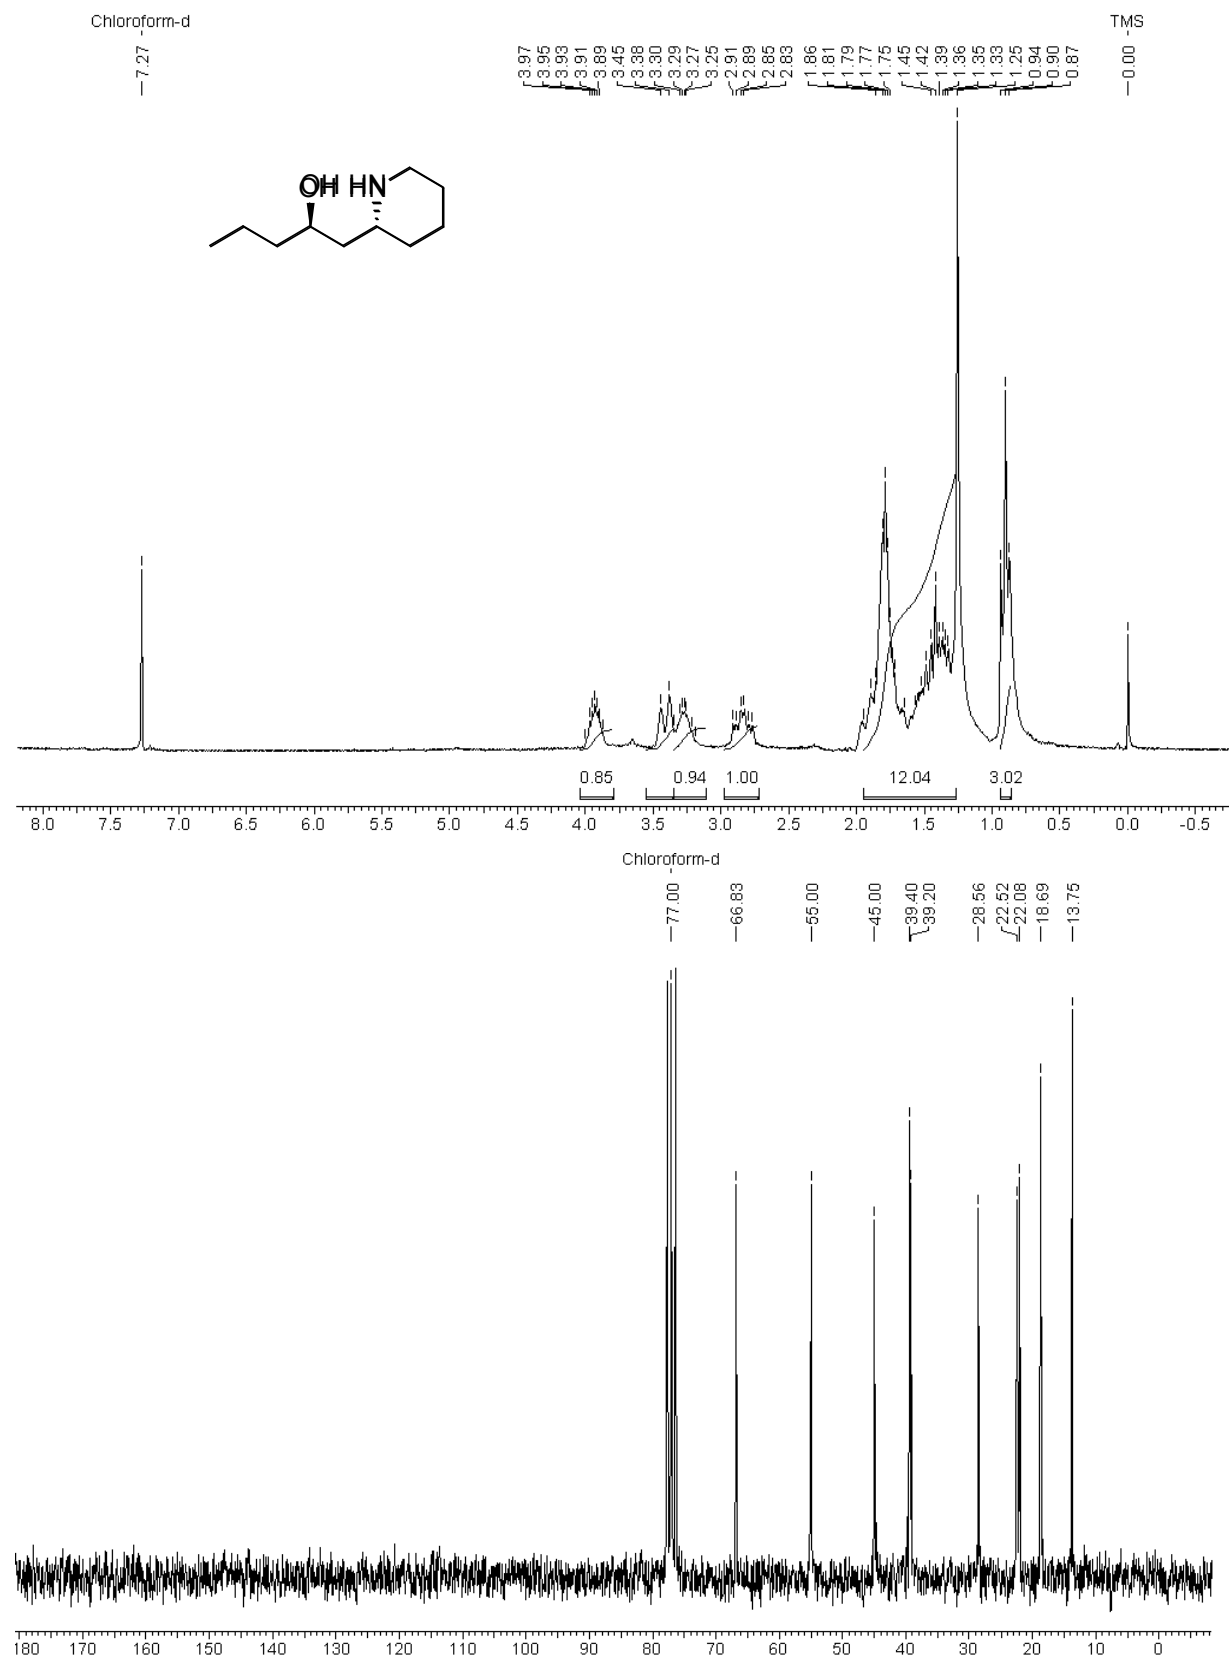



***tert*-Butyl (R)-2-((R)-2-((*tert*-butyldimethylsilyl)oxy)pentyl)-5-oxopyrrolidine-1-carboxylate (17):**

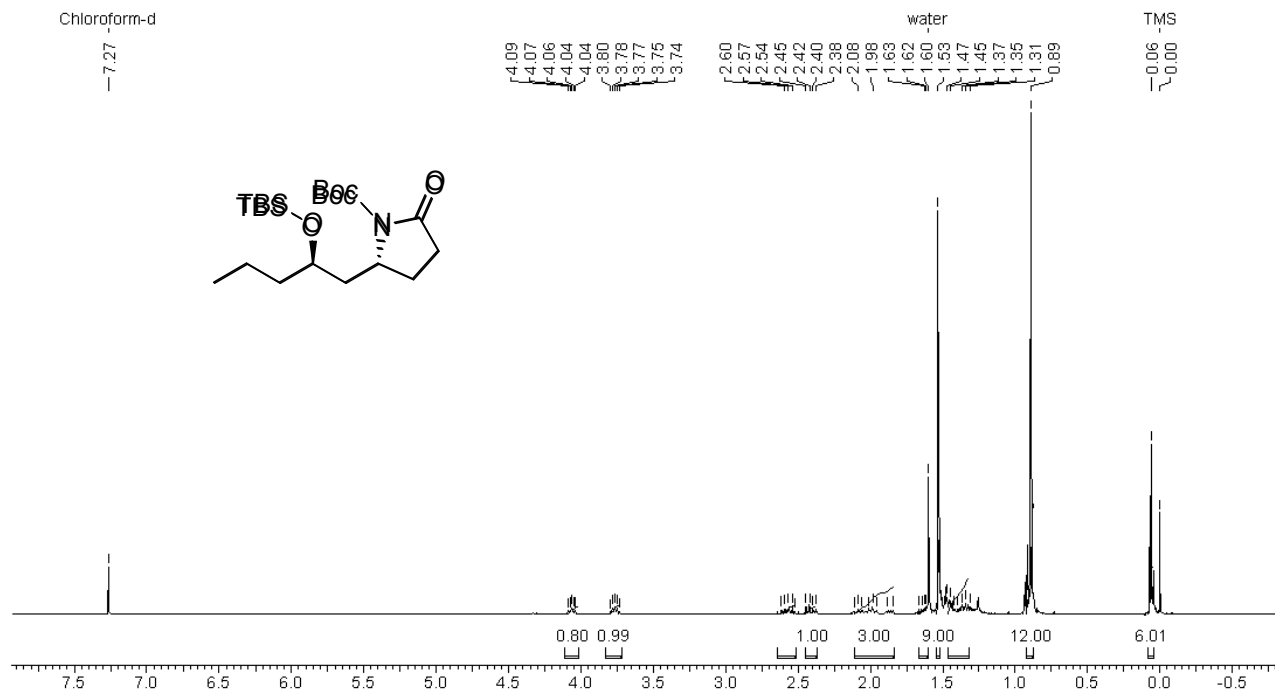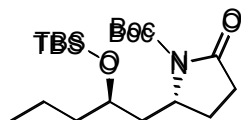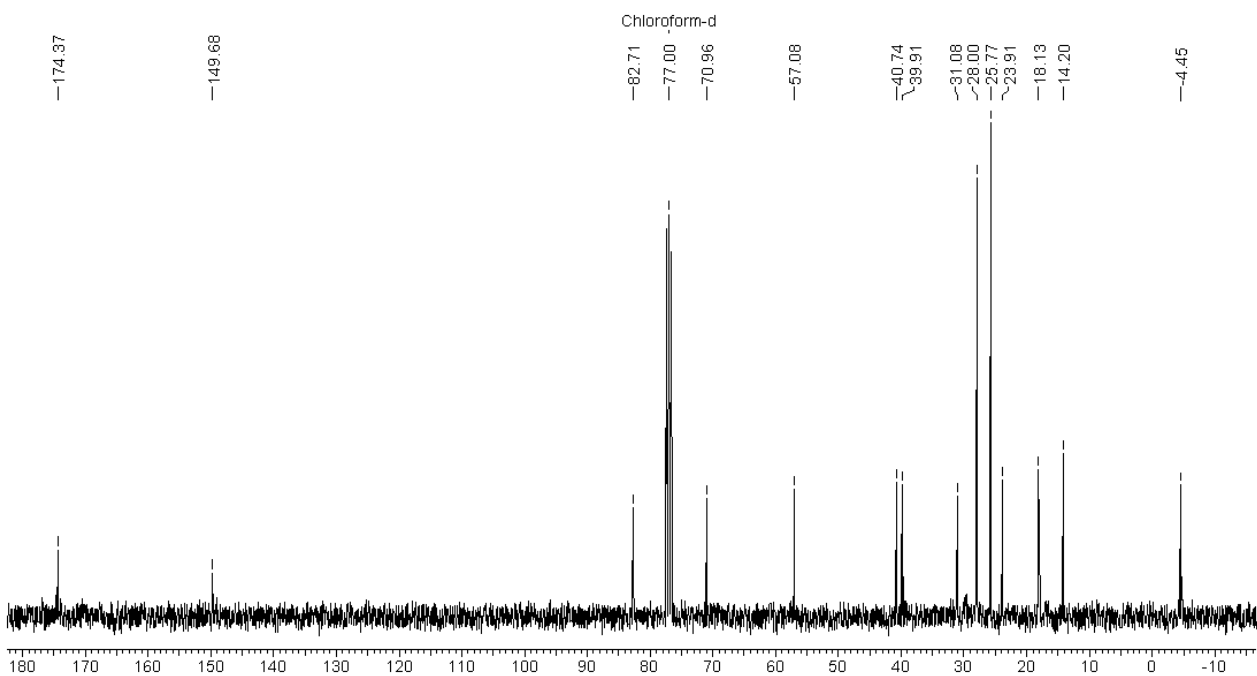

***tert*-Butyl (*R*)-2-((*R*)-2-hydroxypentyl)pyrrolidine-1-carboxylate (15):**

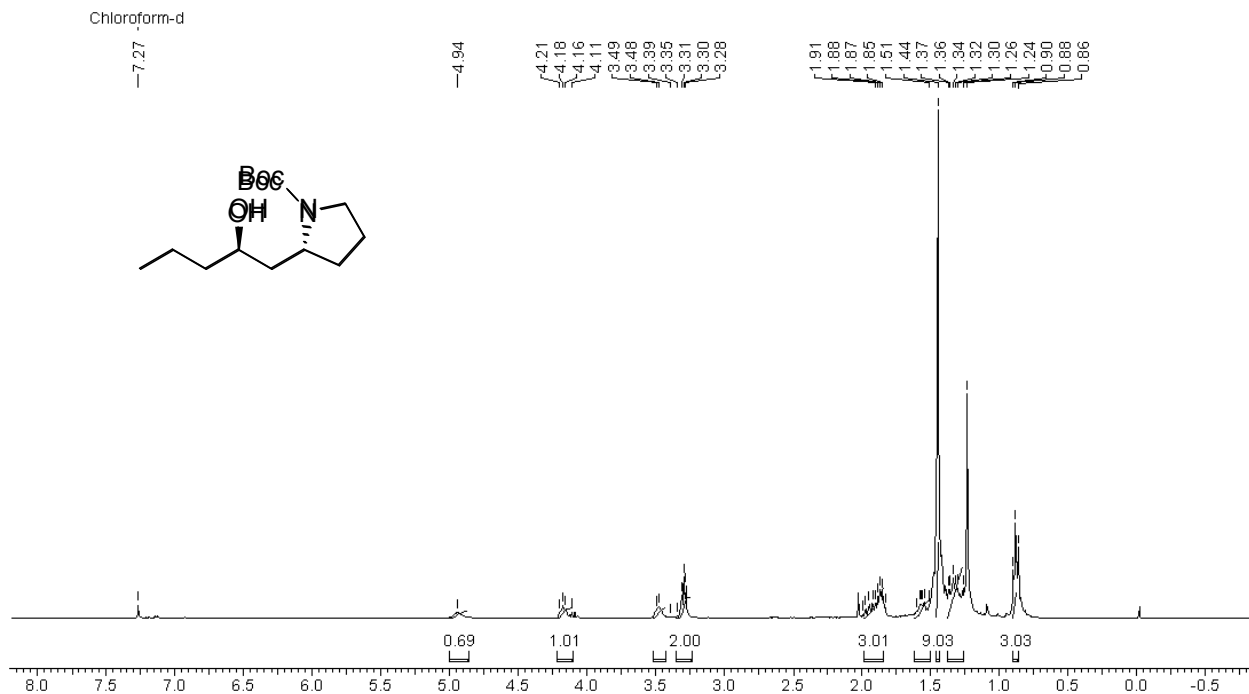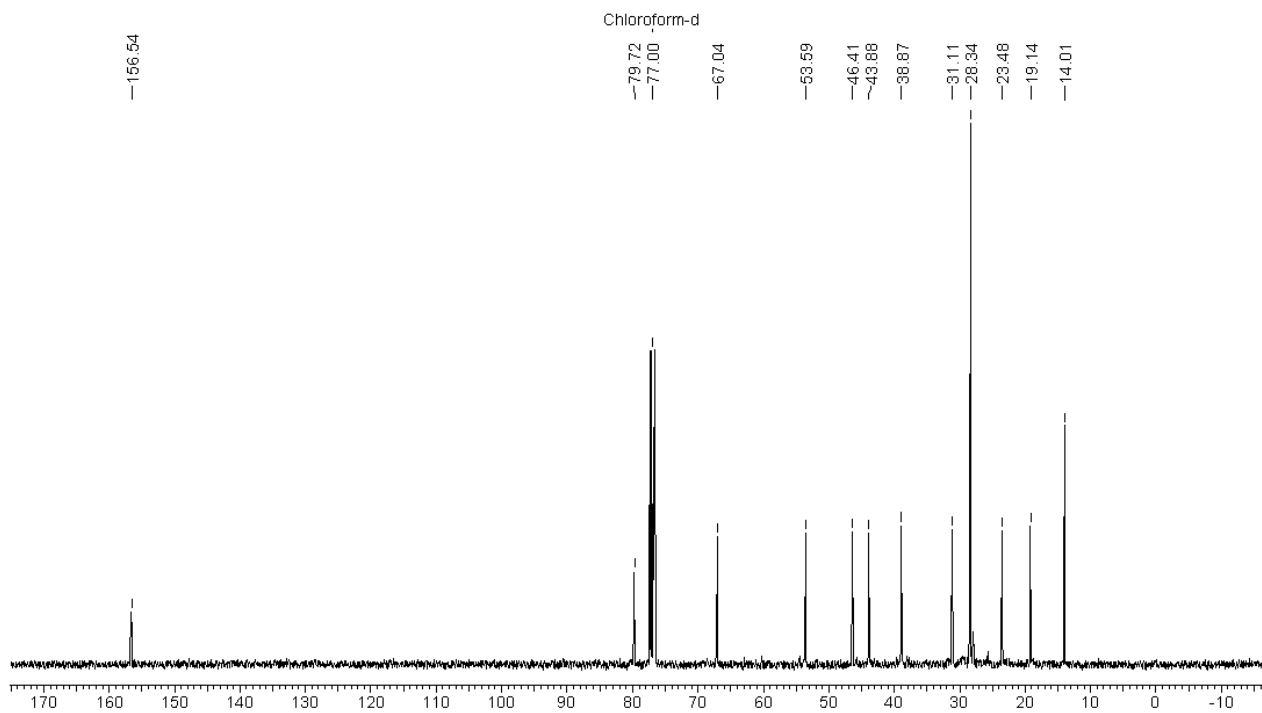

Supplement: c3ra44700f.pdf [file c3ra44700f.pdf]
